# Supplementary material
Source: MDPI journal article supplement (https://www.mdpi.com/2673-7256/1/3/31)
Supplement: s1 [file s1]

# Mono-, di-, tri-pyrene substituted cyclic triimidazole: A family of highly emissive and RTP chromophores

Daniele Malpicci <sup>1,2</sup>, Clelia Giannini <sup>1</sup>, Elena Lucenti <sup>2,3</sup>, Alessandra Forni <sup>2,3,\*</sup>, Daniele Marinotto <sup>2,3</sup> and Elena Cariati <sup>1,2,3,\*</sup>

<sup>1</sup> Department of Chemistry, Università degli Studi di Milano, via Golgi 19, 20133 Milano (Italy); daniele.malpicci@unimi.it (D.M.); clelia.giannini@unimi.it (C.G.); elena.cariati@unimi.it (E.C.)

<sup>2</sup> CNR-SCITEC, Institute of Chemical Sciences and Technologies “Giulio Natta”, via Golgi 19, 20133 Milano (Italy); elena.lucenti@scitec.cnr.it (E.L.); alessandra.forni@scitec.cnr.it (A.F.); daniele.marinotto@scitec.cnr.it (D.M.)

<sup>3</sup> INSTM RU, via Golgi 19, 20133 Milano (Italy)

\* Correspondence: alessandra.forni@scitec.cnr.it (A.F.); elena.cariati@unimi.it (E.C.)

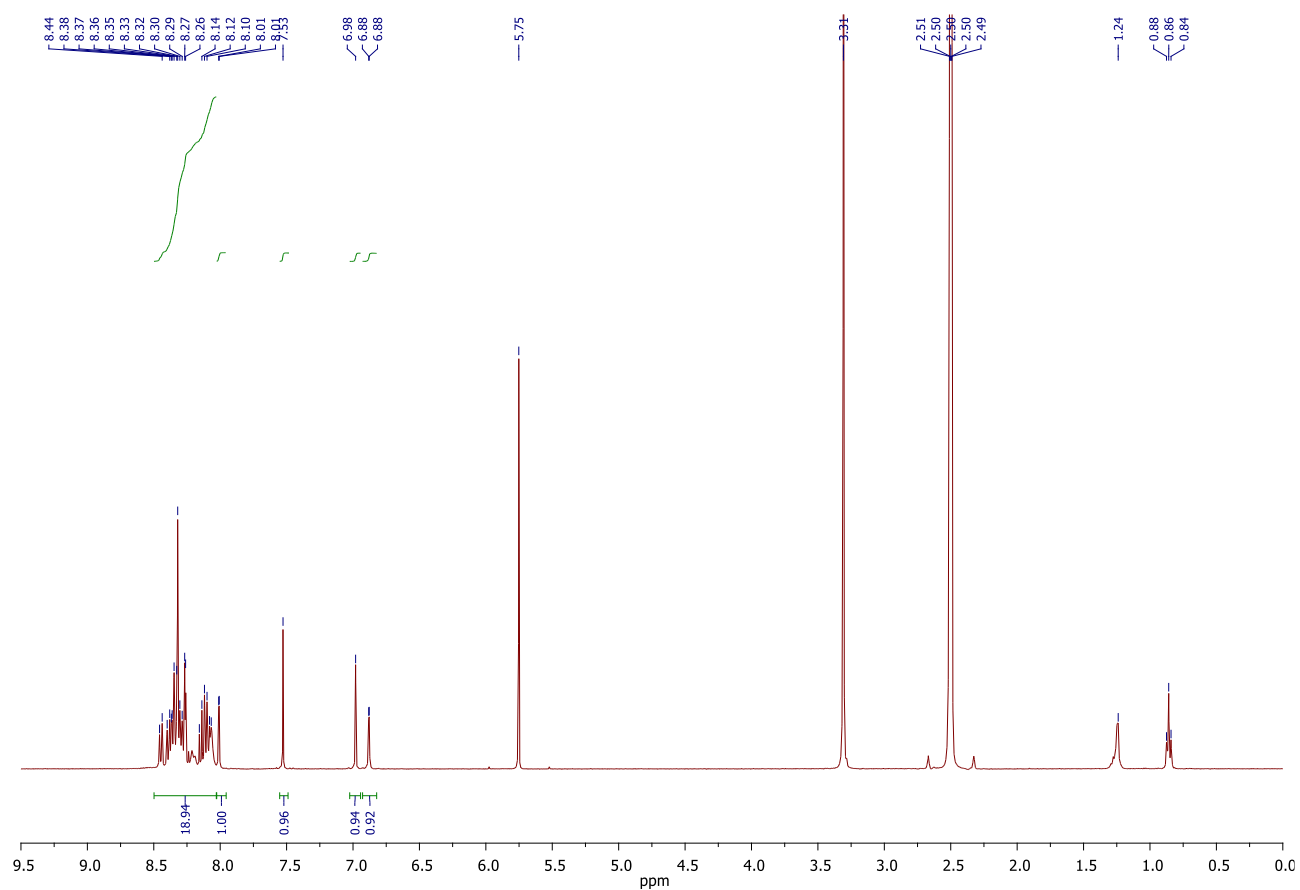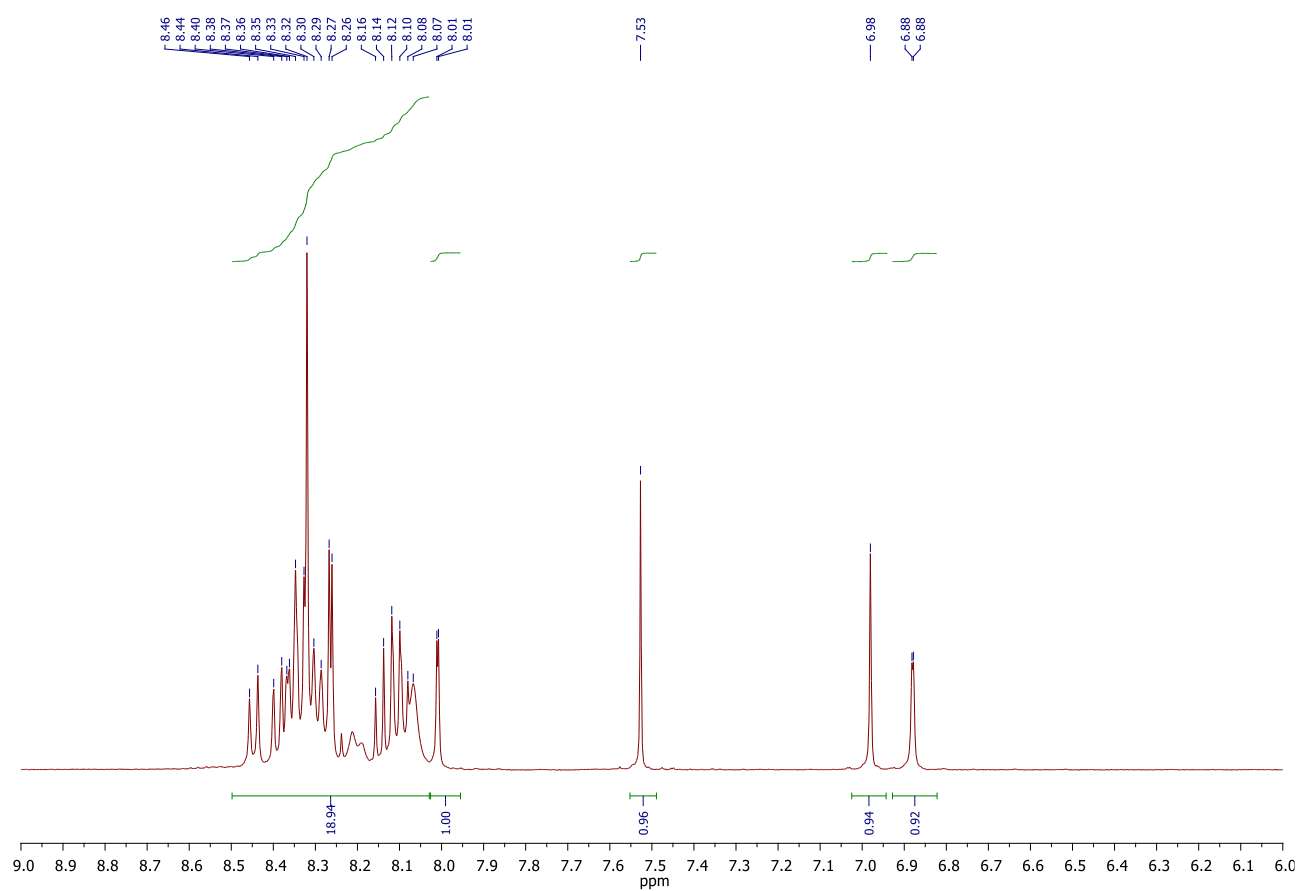

**Figure S1.** <sup>1</sup>H NMR spectrum and expanded region of **TTPyr<sub>2</sub>** (400 MHz, DMSO-d<sub>6</sub>)

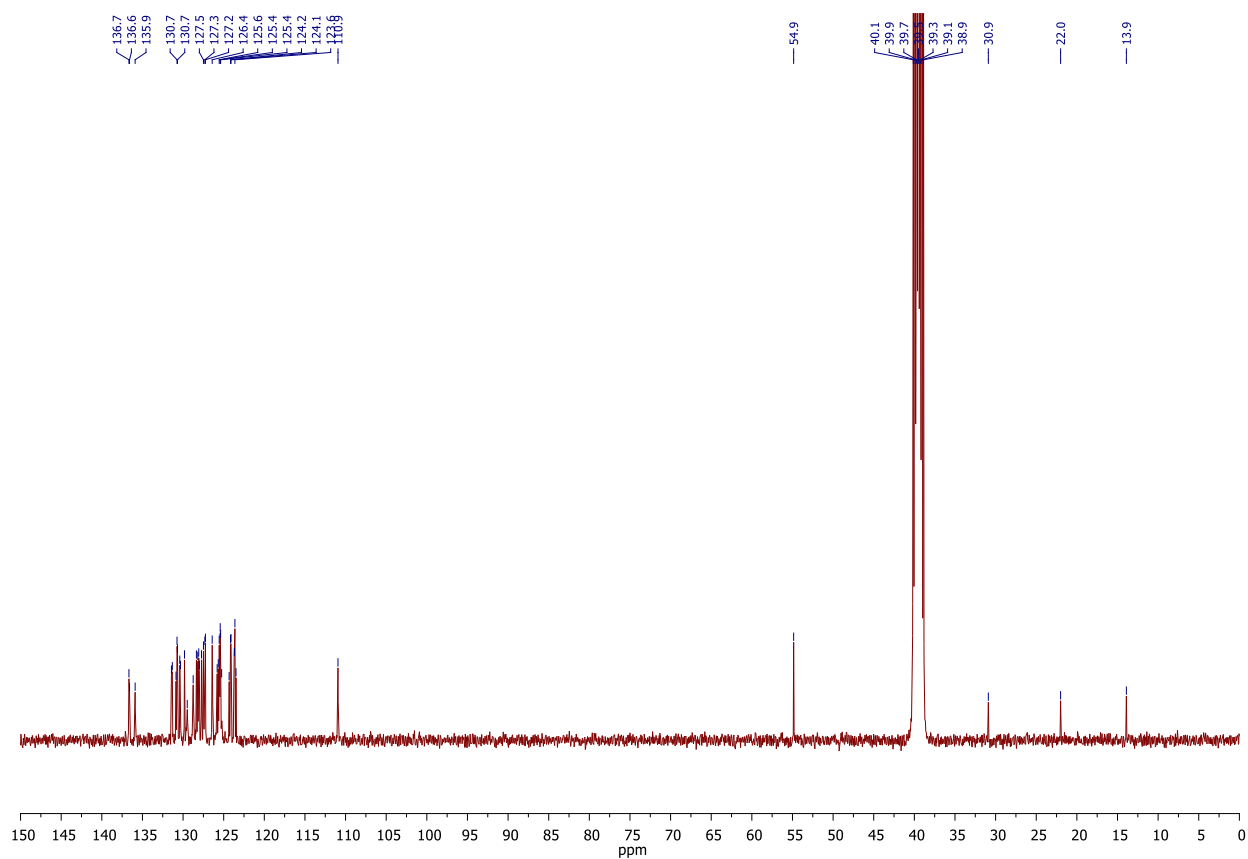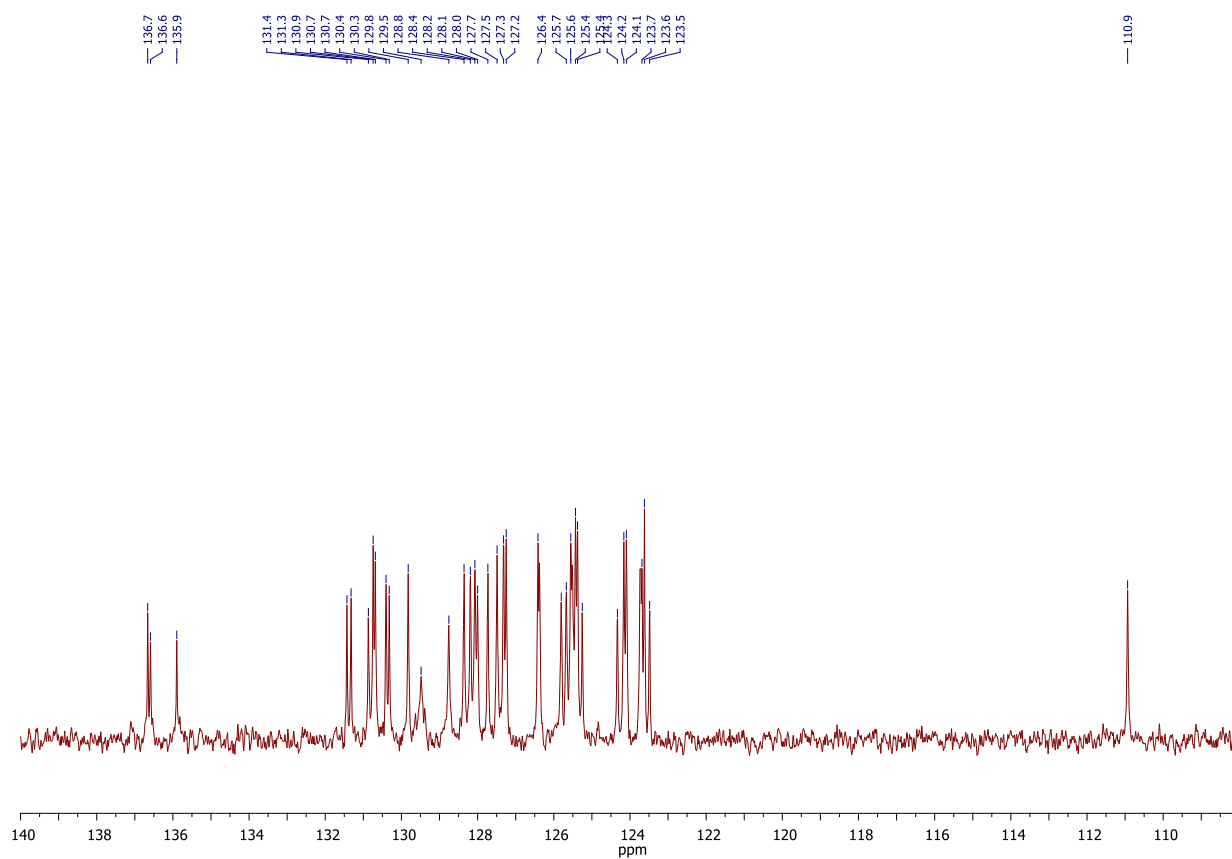

**Figure S2.**  $^{13}\text{C}$  NMR spectrum and expanded region of **TTPyr<sub>2</sub>** (400 MHz, DMSO- $\text{d}_6$ )

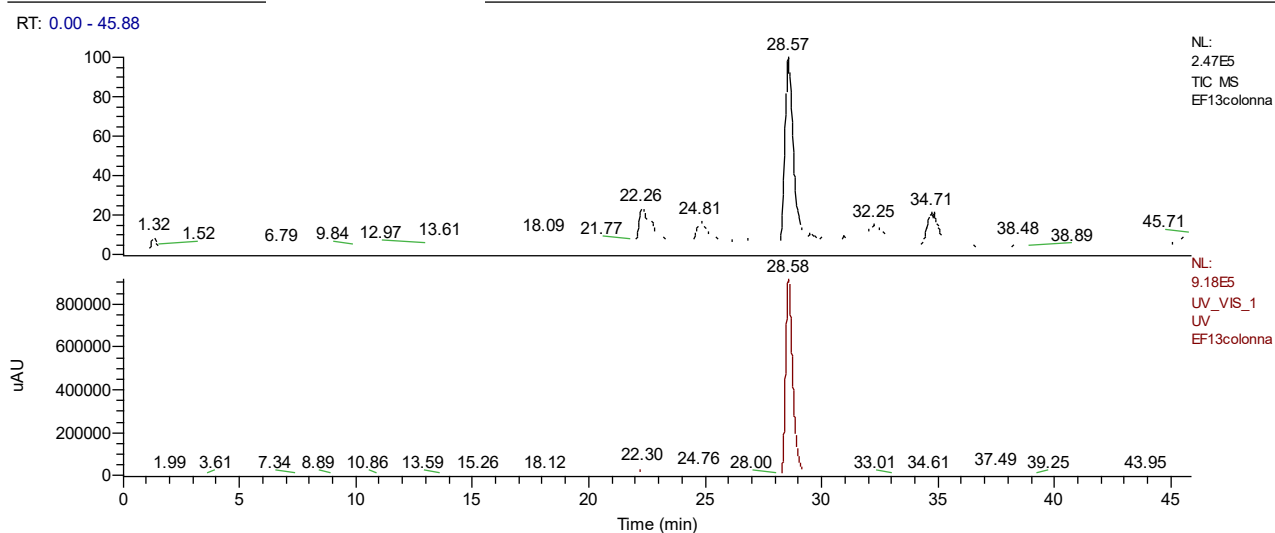

EF13colonna #853 RT: 28.62 AV: 1 NL: 5.66E4  
T: ITMS + c ESI Full ms [50.00-2000.00]

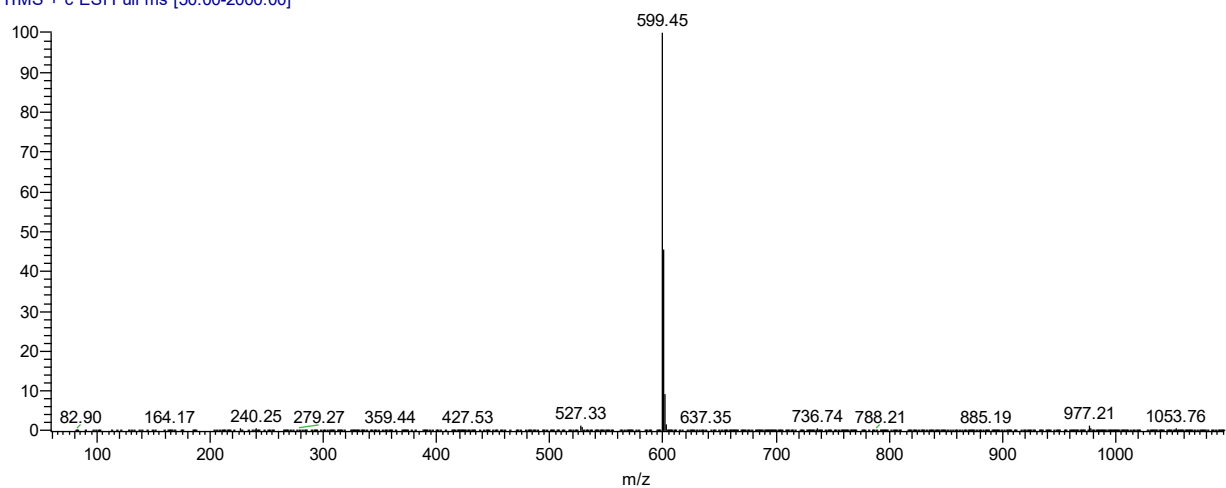

**Figure S3.** LC-MS profile of **TTPyr<sub>2</sub>**

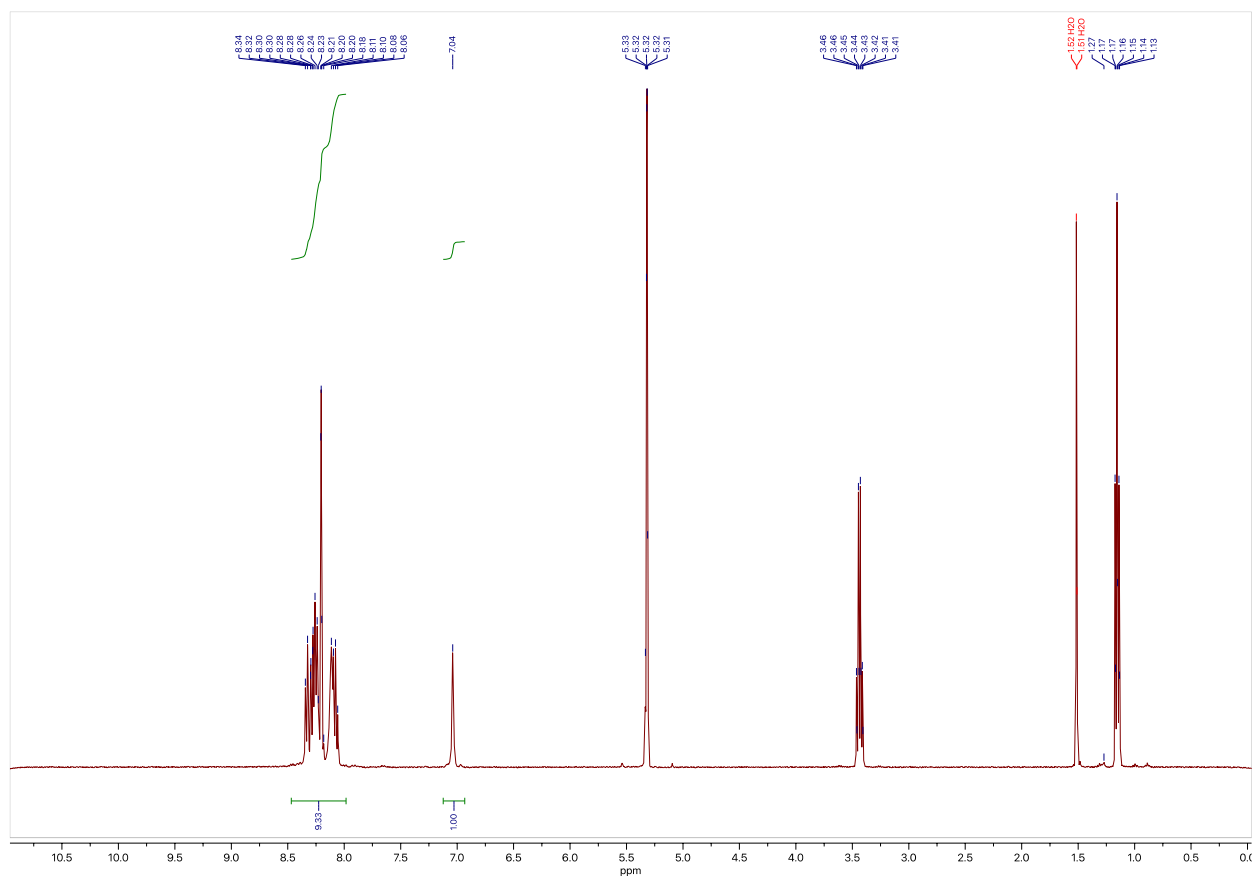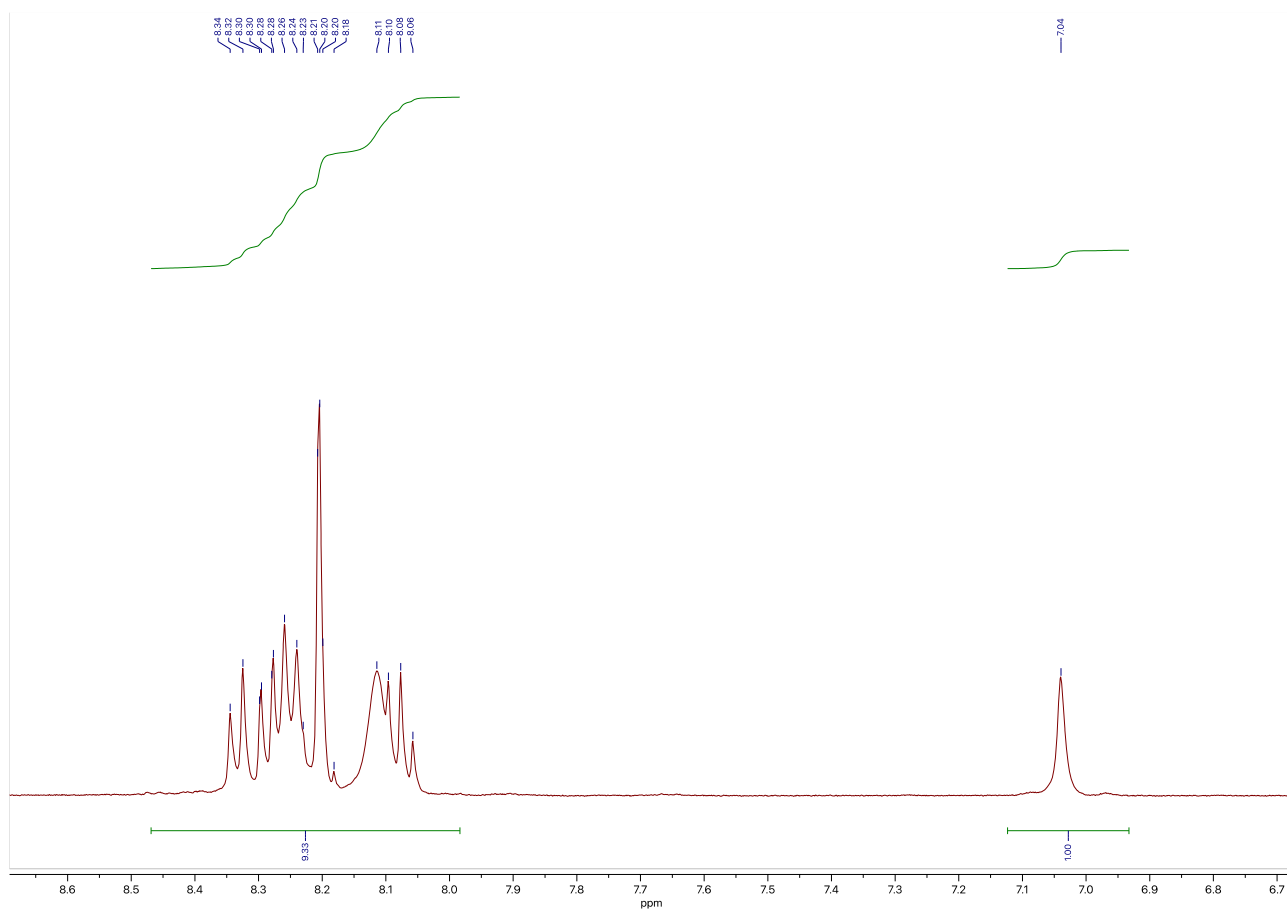

**Figure S4.**  $^1\text{H}$  NMR spectrum and expanded region of **TTPyr<sub>3</sub>** (400 MHz,  $\text{CD}_2\text{Cl}_2$ )

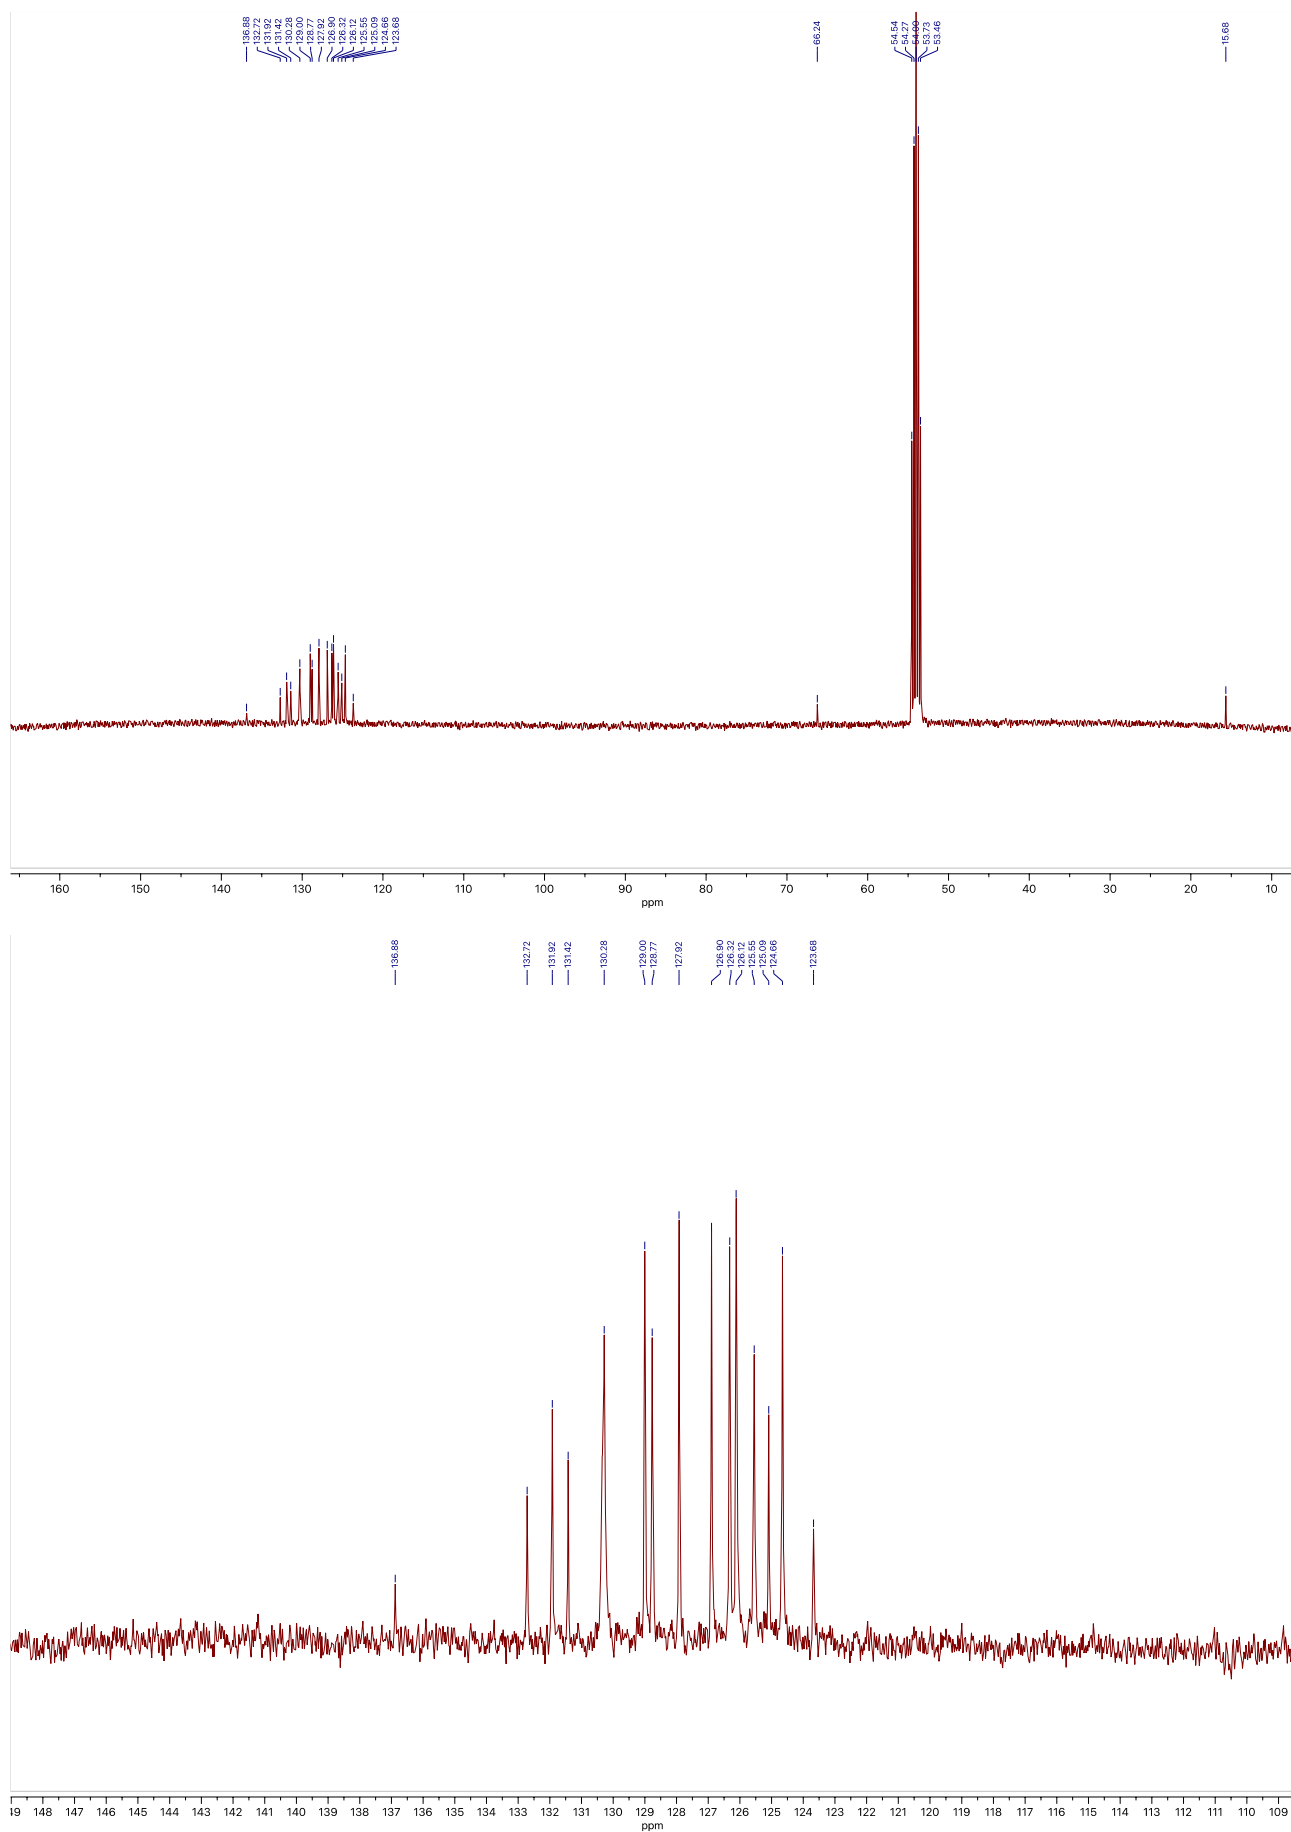

**Figure S5.**  $^{13}\text{C}$  NMR spectrum and expanded region of **TTPyr<sub>3</sub>** (400 MHz,  $\text{CD}_2\text{Cl}_2$ )

RT: 0.00 - 43.24

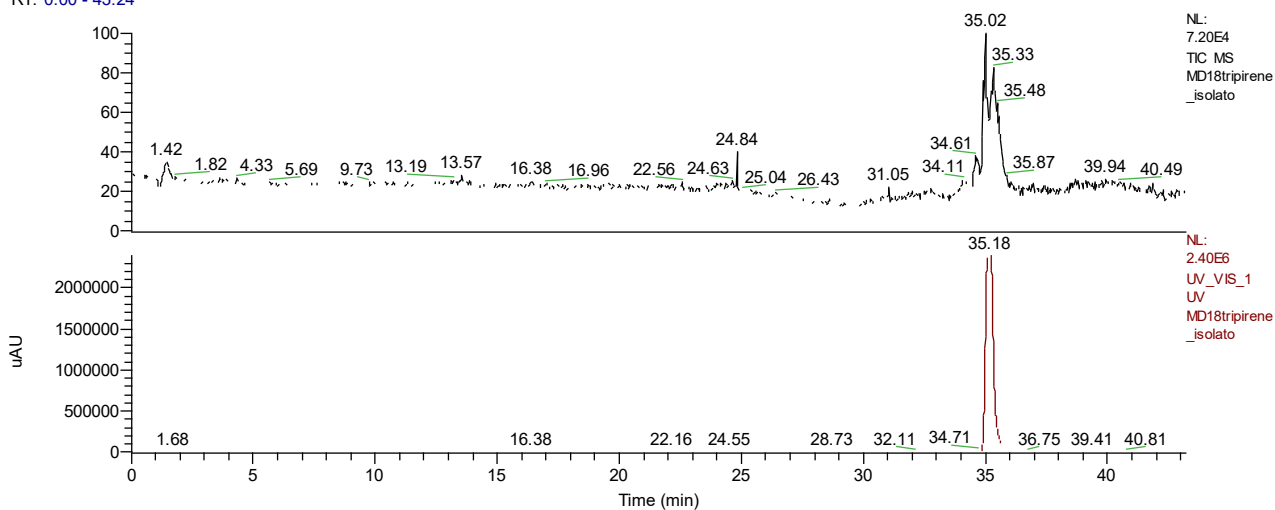

MD18triprene\_isolato #1026-1056 RT: 34.77-35.71 AV: 31 NL: 2.33E4  
T: ITMS + c ESI Full ms [50.00-2000.00]

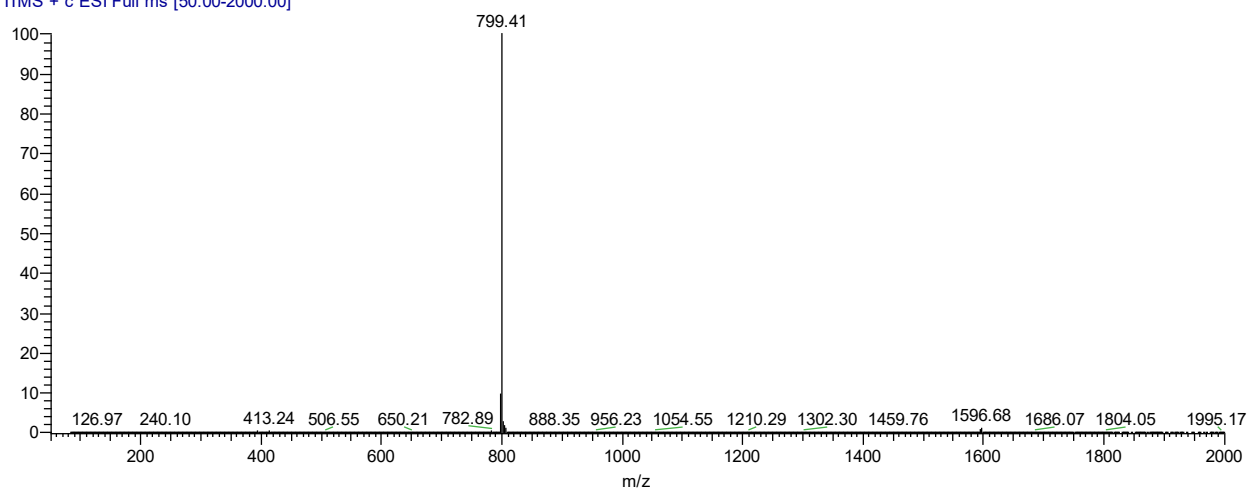

**Figure S6.** LC-MS profile of TTPyr<sub>3</sub>

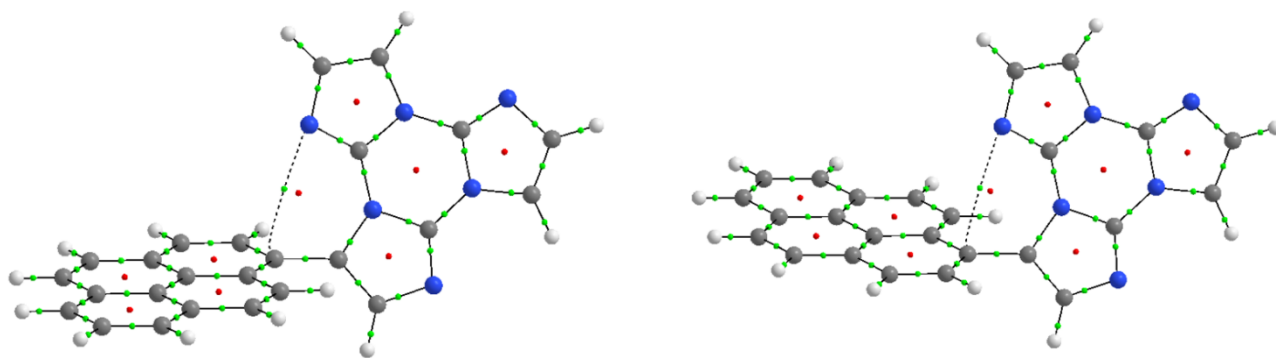

**Figure S7.** Molecular graphs of **TTPyr<sub>1</sub>** in ground state RT (left) and HT (right) conformation with bond paths, bond critical points (green circles) and ring critical points (red circles).

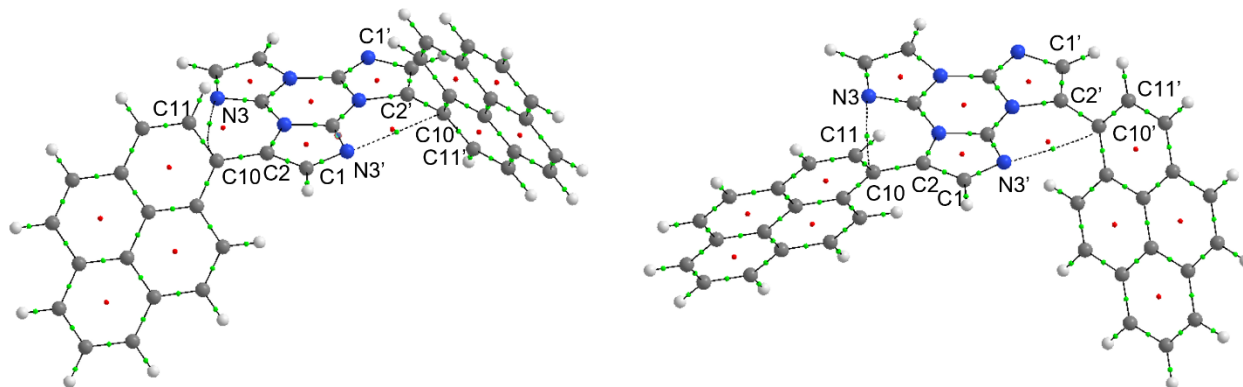

**Figure S8.** Molecular graphs of **TTPyr<sub>2</sub>** in ground state RT/RT (left) and HT/HT (right) conformation with bond paths, bond critical points (green circles) and ring critical points (red circles).

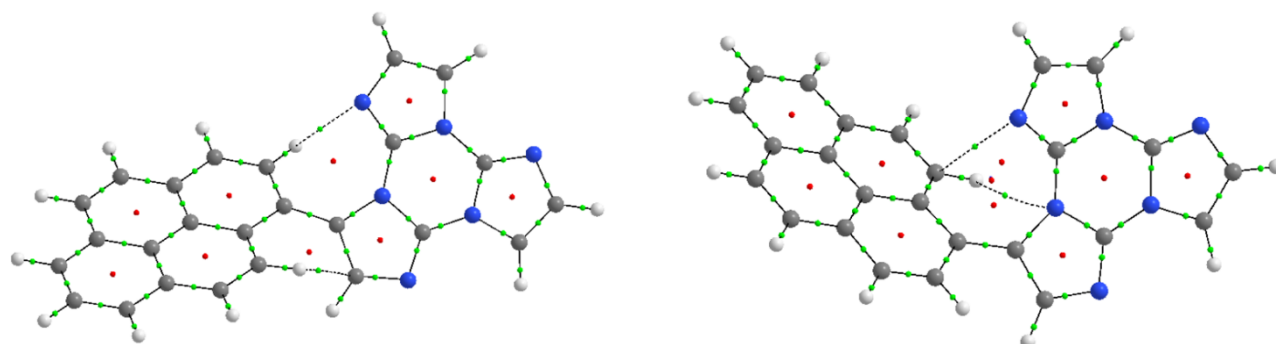

**Figure S9.** Molecular graphs of **TTPyr<sub>1</sub>** in excited state RT (left) and HT (right) conformation with bond paths, bond critical points (green circles) and ring critical points (red circles).

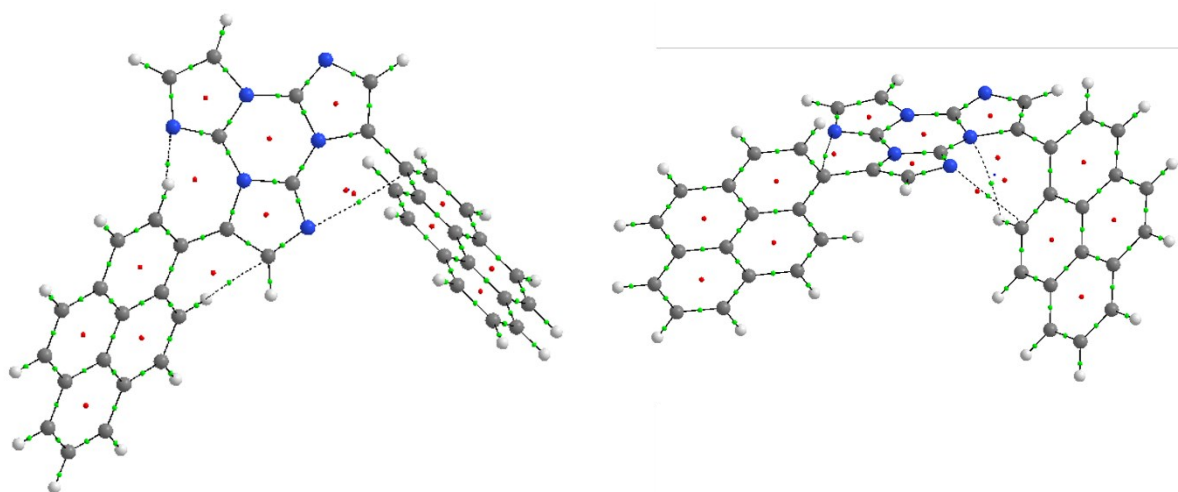

**Figure S10.** Molecular graphs of **TTPyr<sub>2</sub>** in excited state RT/RT (left) and HT/HT (right) conformation with bond paths, bond critical points (green circles) and ring critical points (red circles).



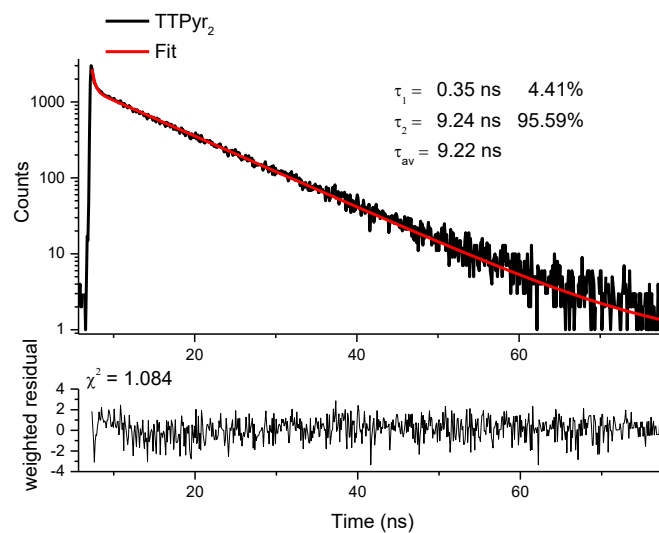

**Figure S11.** Lifetime measurement ( $\lambda_{exc} = 374 \text{ nm}$ ,  $\lambda_{em} = 420 \text{ nm}$ ) of **TTPyr<sub>2</sub>** in DMSO at 298 K.

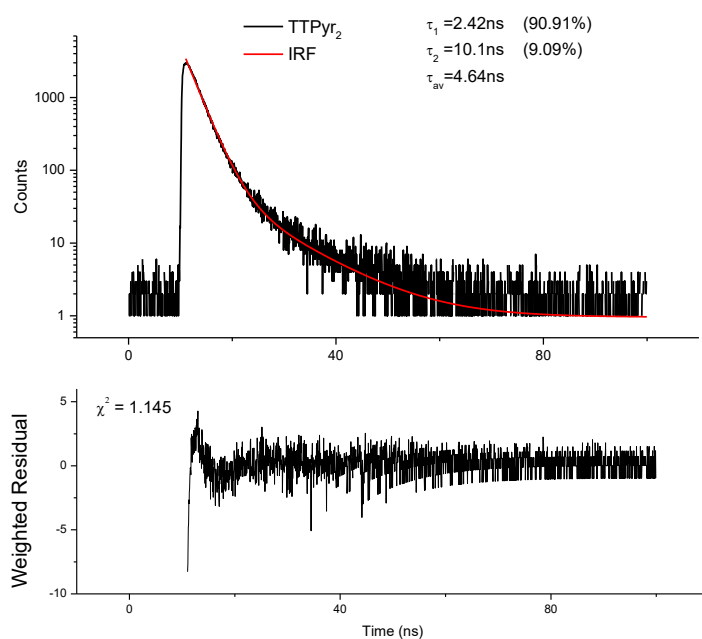

**Figure S12.** Lifetime measurement ( $\lambda_{exc} = 375 \text{ nm}$ ,  $\lambda_{em} = 490 \text{ nm}$ ) of **TTPyr<sub>2</sub>** powders at 298 K.

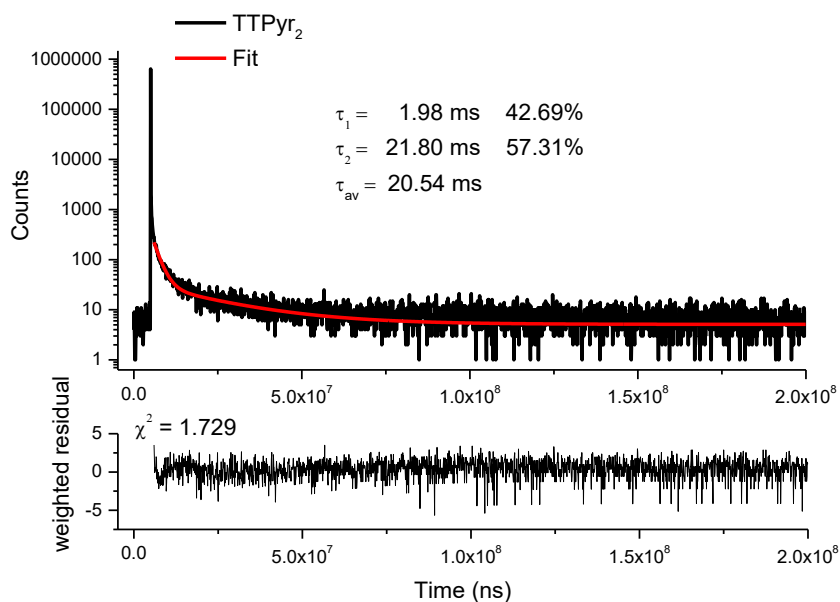

**Figure S13.** Lifetime measurement ( $\lambda_{exc} = 340 \text{ nm}$ ,  $\lambda_{em} = 530 \text{ nm}$ ) of **TTPyr<sub>2</sub>** powders at 298 K.

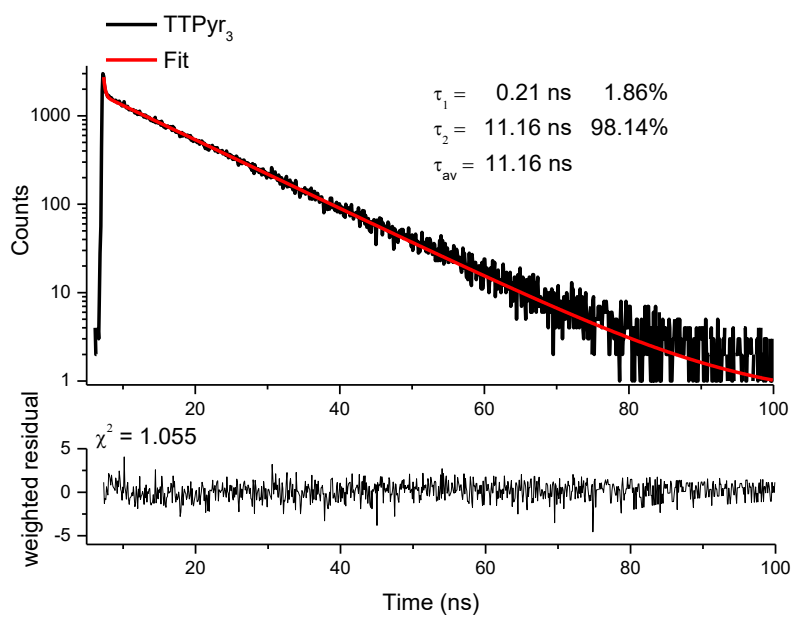

**Figure S14.** Lifetime measurement ( $\lambda_{exc} = 374 \text{ nm}$ ,  $\lambda_{em} = 420 \text{ nm}$ ) of **TTPyr<sub>3</sub>** in DMSO at 298 K.

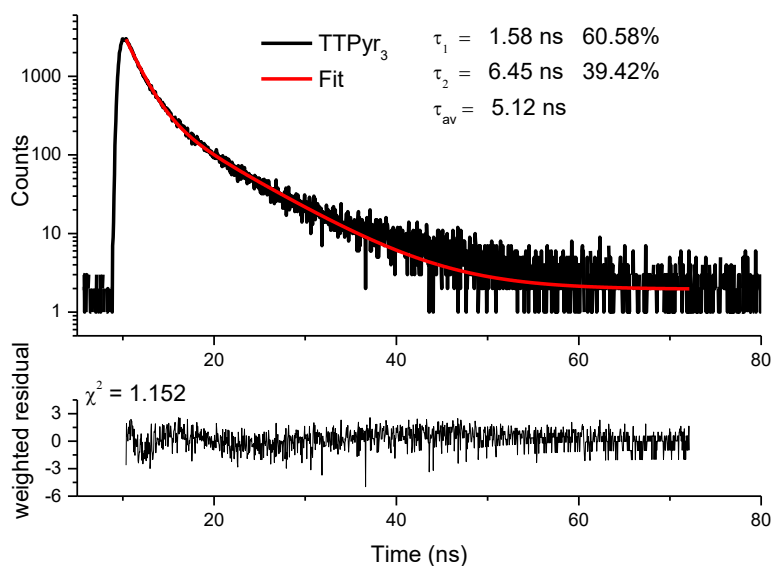

**Figure S15.** Lifetime measurement ( $\lambda_{exc} = 300 \text{ nm}$ ,  $\lambda_{em} = 470 \text{ nm}$ ) of **TTPyr<sub>3</sub>** powders at 298 K.

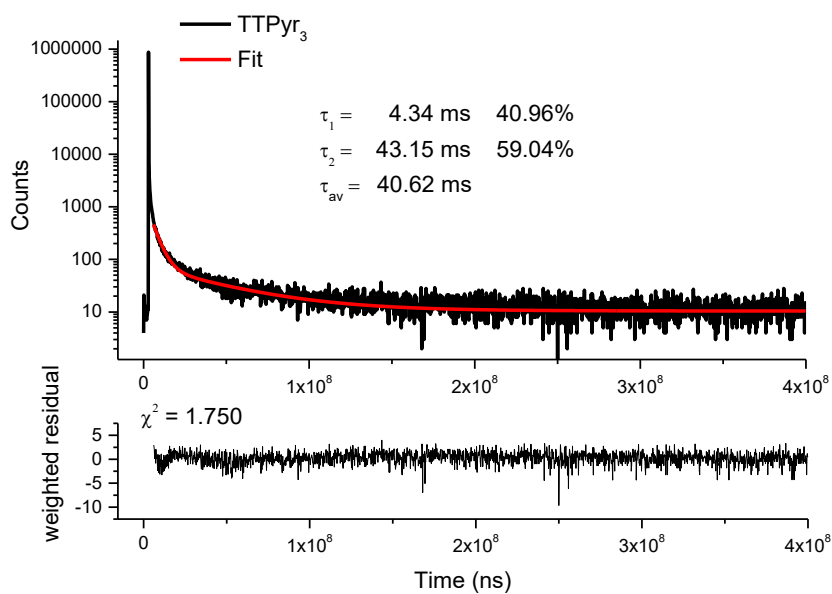

**Figure S16.** Lifetime measurement ( $\lambda_{exc} = 340 \text{ nm}$ ,  $\lambda_{em} = 520 \text{ nm}$ ) of **TTPyr<sub>3</sub>** powders at 298 K.

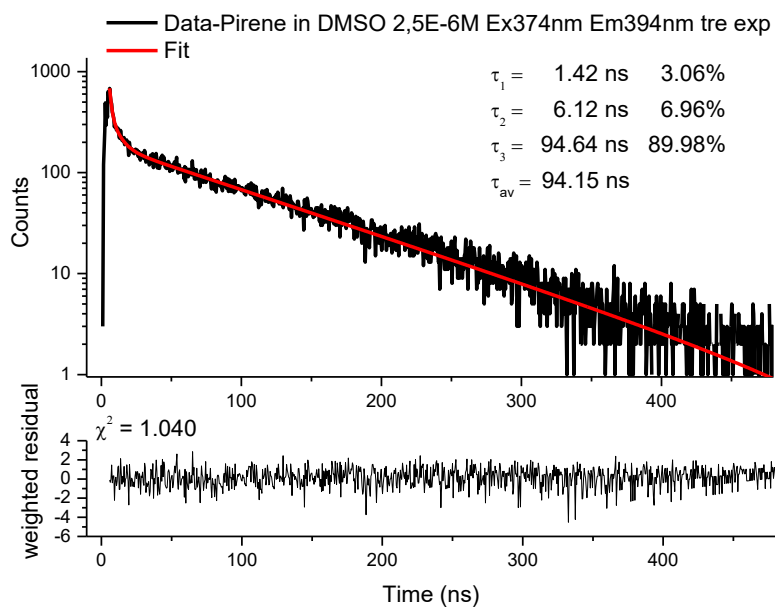

**Figure S17.** Lifetime measurement ( $\lambda_{exc} = 374 \text{ nm}$ ,  $\lambda_{em} = 394 \text{ nm}$ ) of **Pyrene** in DMSO at 298 K.

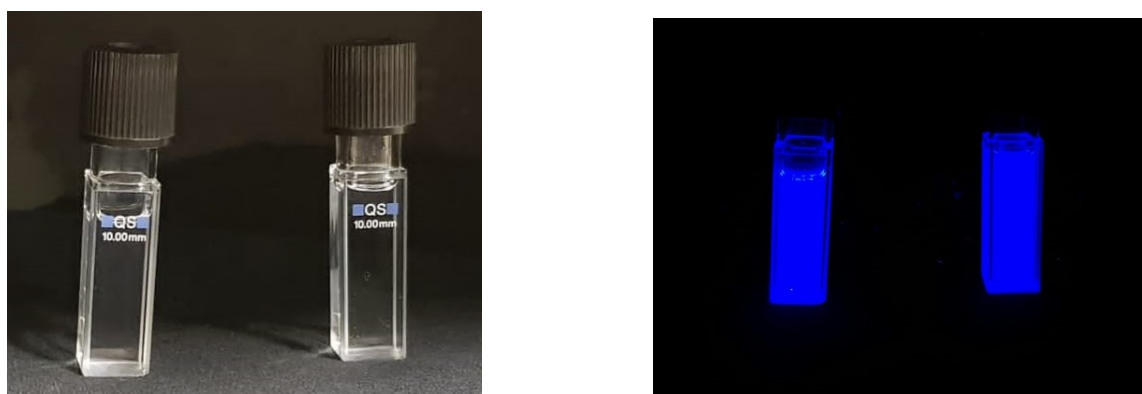

**Figure S18.** Photographs of **TTPyr<sub>2</sub>** (left) and **TTPyr<sub>3</sub>** (right) solutions under UV light OFF (left) or UV light ON (right,  $\lambda_{exc} = 366 \text{ nm}$ )

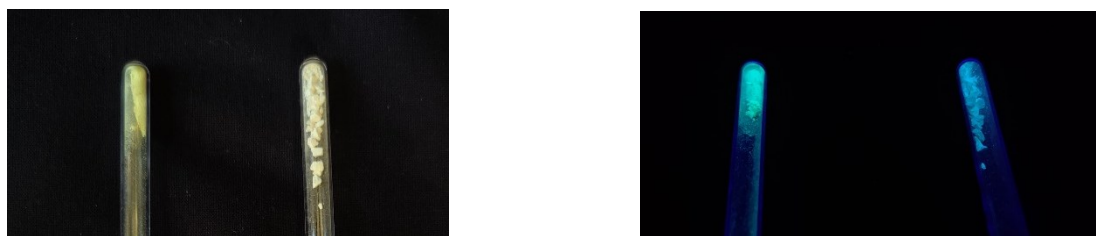

**Figure S19.** Photographs of powders of **TTPyr<sub>2</sub>** (left) and **TTPyr<sub>3</sub>** (right) under UV light OFF (left) or UV light ON (right,  $\lambda_{exc} = 366 \text{ nm}$ )

**Table S1.** Excitation energies (nm), oscillator strength (*f*) and composition of the first singlet transitions computed for pyrene, **TT-Pyr<sub>1</sub>** (HT and RT conformations) and **TT-Pyr<sub>2</sub>** (HT/HT and RT/RT conformations).<sup>a</sup>

| Molecule                              | S <sub>1</sub> , <i>f</i><br>weights                                  | S <sub>2</sub> , <i>f</i><br>weights                                       | S <sub>3</sub> , <i>f</i><br>weights                                       | S <sub>4</sub> , <i>f</i><br>weights     | S <sub>5</sub> , <i>f</i><br>weights       | S <sub>6</sub> , <i>f</i><br>weights                         | S <sub>7</sub> , <i>f</i><br>weights                                       | S <sub>8</sub> , <i>f</i><br>Weights       |
|---------------------------------------|-----------------------------------------------------------------------|----------------------------------------------------------------------------|----------------------------------------------------------------------------|------------------------------------------|--------------------------------------------|--------------------------------------------------------------|----------------------------------------------------------------------------|--------------------------------------------|
| Pyrene                                | ES <sub>1</sub>                                                       |                                                                            | ES <sub>2</sub>                                                            |                                          |                                            |                                                              |                                                                            |                                            |
|                                       | 301, 0.0003<br>H-1→L (44%)<br>H→L+1 (52%)                             | 294, 0.347<br>H→L (87%)                                                    | 249, 0.0000<br>H→L+5 (86%)                                                 | 231, 0.526<br>H-1→L (54%)<br>H→L+1 (46%) |                                            |                                                              |                                                                            |                                            |
|                                       |                                                                       |                                                                            |                                                                            |                                          |                                            |                                                              |                                                                            |                                            |
| TT-Pyr <sub>1</sub><br>conf. HT       | ES <sub>1</sub>                                                       |                                                                            | ES <sub>2</sub>                                                            |                                          |                                            |                                                              |                                                                            |                                            |
|                                       | 304, 0.229<br>H-1→L (21%)<br>H→L (42%)<br>H→L+1 (26%)                 | 302, 0.257<br>H-1→L (17%)<br>H→L (47%)<br>H→L+1 (22%)                      | 249, 0.0045<br>H-5→L (13%)<br>H→L+9 (64%)                                  | 237, 0.718<br>H-1→L (43%)<br>H→L+1 (35%) |                                            |                                                              |                                                                            |                                            |
| TT-Pyr <sub>1</sub><br>conf. RT       | 304, 0.060<br>H-1→L (35%)<br>H→L (10%)<br>H→L+1 (43%)                 | 302, 0.498<br>H→L (79%)                                                    | 251, 0.008<br>H→L+9 (66%)                                                  | 238, 0.570<br>H-1→L (42%)<br>H→L+1 (31%) |                                            |                                                              |                                                                            |                                            |
|                                       |                                                                       |                                                                            |                                                                            |                                          |                                            |                                                              |                                                                            |                                            |
| ES <sub>1</sub>                       |                                                                       |                                                                            |                                                                            |                                          |                                            |                                                              |                                                                            |                                            |
| TT-Pyr <sub>2</sub><br>conf.<br>HT/HT | ES <sub>2</sub>                                                       |                                                                            |                                                                            |                                          |                                            |                                                              |                                                                            |                                            |
|                                       | 306, 0.380<br>H-1→L+1 (33%)<br>H→L (35%)                              | 304, 0.101<br>H-3→L (16%)<br>H-2→L+1 (14%)<br>H-1→L+2 (12%)<br>H→L+2 (12%) | 303, 0.066<br>H-3→L+1 (15%)<br>H-2→L (12%)<br>H-1→L+2 (12%)<br>H→L+3 (12%) | 301, 0.445<br>H-1→L (35%)<br>H→L+1 (37%) | 249, 0.003<br>H-1→L+13(34%)<br>H→L+15(17%) | 249, 0.007<br>H-1→L+15 (22%)<br>H→L+13 (20%)<br>H→L+15 (12%) | 238, 1.272<br>H-3→L+1 (20%)<br>H-2→L (22%)<br>H-1→L+3 (12%)<br>H→L+4 (12%) | 237, 0.198<br>H-3→L (10%)<br>H-2→L+1 (17%) |
|                                       |                                                                       |                                                                            |                                                                            |                                          |                                            |                                                              |                                                                            |                                            |
| TT-Pyr <sub>2</sub><br>conf.<br>RT/RT | ES <sub>1</sub>                                                       |                                                                            |                                                                            |                                          | ES <sub>2</sub>                            |                                                              |                                                                            |                                            |
|                                       | 306, 0.709<br>H-1→L (35%)<br>H-1→L+1(10%)<br>H→L (11%)<br>H→L+1 (30%) | 304, 0.011<br>H-2→L+1(34%)<br>H→L+3 (38%)                                  | 303, 0.132<br>H-3→L (25%)<br>H-1→L+2(28%)<br>H→L+1 (18%)                   | 301, 0.258<br>H-1→L (41%)<br>H→L+1(27%)  | 251, 0.012<br>H→L+13(53%)                  | 249, 0.004<br>H-1→L+14 (34%)<br>H-1→L+15 (19%)               | 240, 0.641<br>H-2→L+1 (37%)<br>H→L+3 (22%)                                 | 237, 0.758<br>H-3→L (37%)<br>H-1→L+2 (26%) |

<sup>a</sup>H and L stand for HOMO and LUMO, respectively; only contributions with weight ≥ 10% are reported.

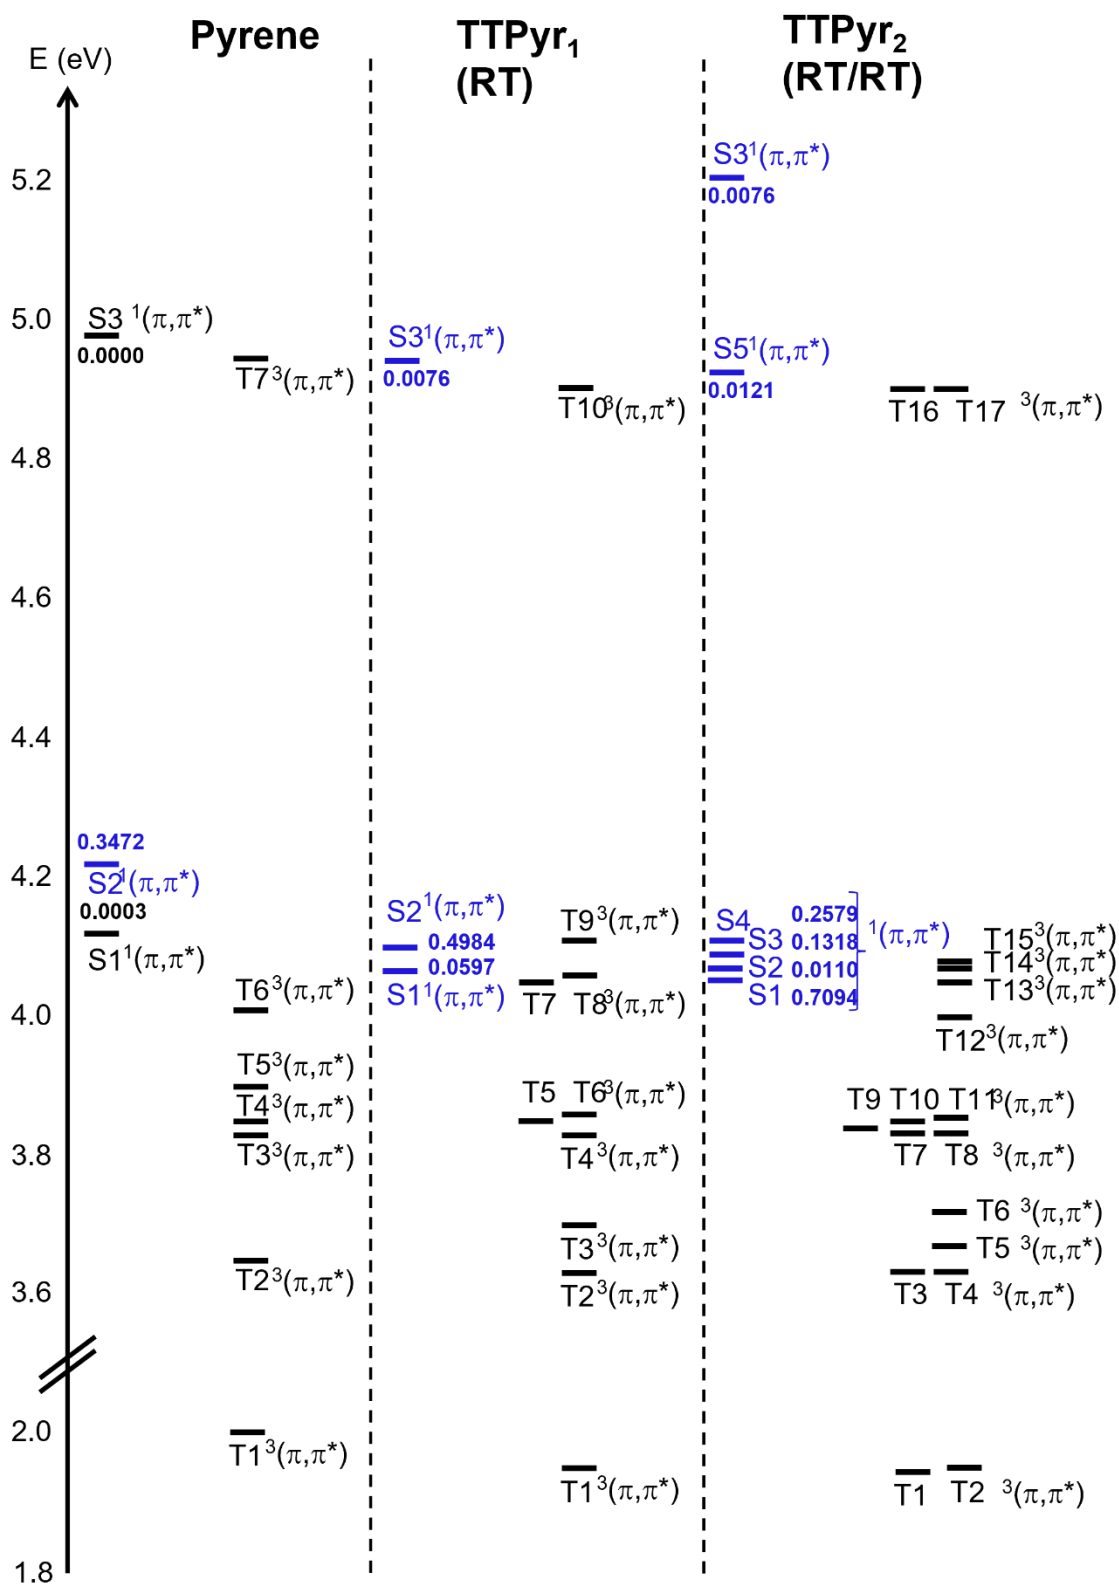

**Figure S20.** Electronic levels computed for pyrene, TTPyr<sub>1</sub> and TTPyr<sub>2</sub> at molecular level. In blue are reported the singlet levels with oscillator strength  $f \geq 0.001$  and the corresponding values of  $f$  (see detailed information in Table S1).

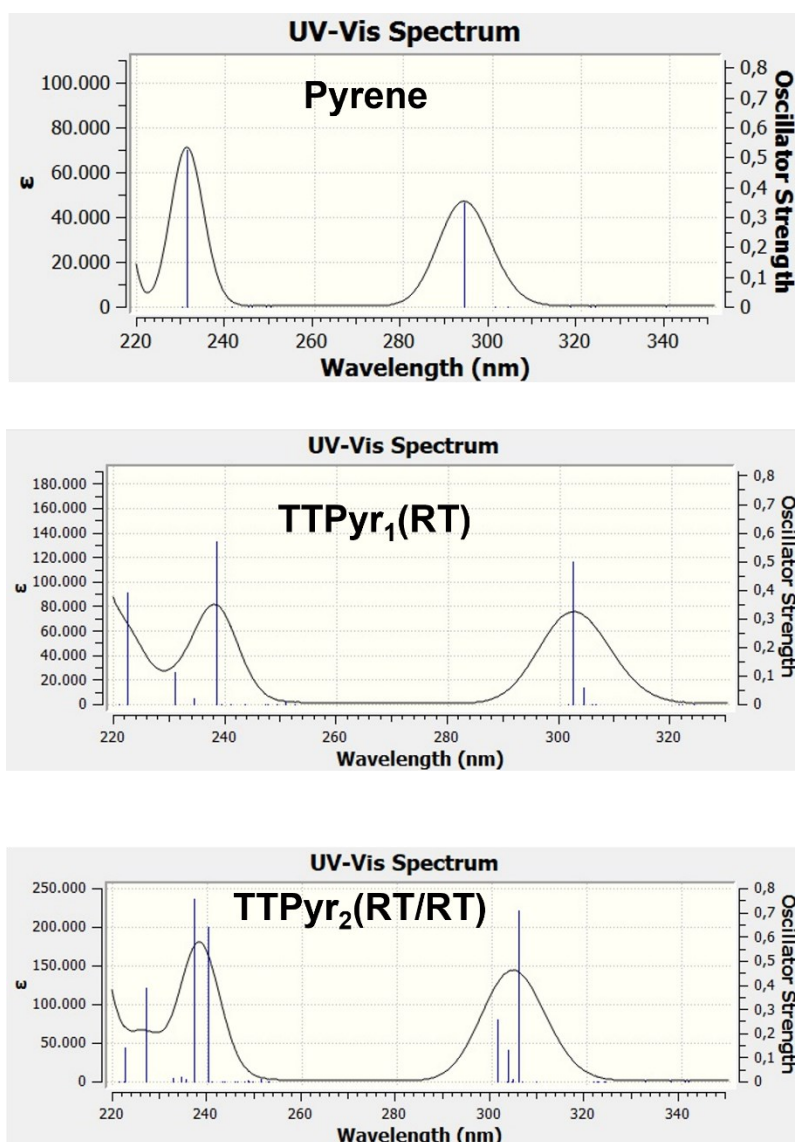

**Figure S21.** Simulated absorption spectra of pyrene (top), **TTPyr<sub>1</sub>**, RT conformation (middle) and **TTPyr<sub>2</sub>**, RT/RT conformation (bottom) at  $\omega$ B97X/6-311++G(d,p) level of theory, resulting from convolution of the singlet excitation energies with 0.1 eV of half-bandwidth (singlet levels plotted as blue sticks according to their oscillator strength).

# TTPyr<sub>1</sub>(RT)

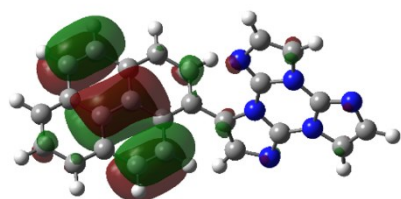

MO=98 (HOMO-5)

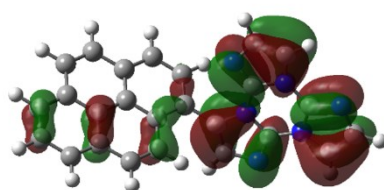

MO=99 (HOMO-4)

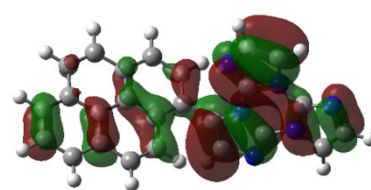

MO=100 (HOMO-3)

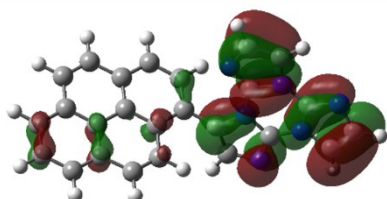

MO=101 (HOMO-2)

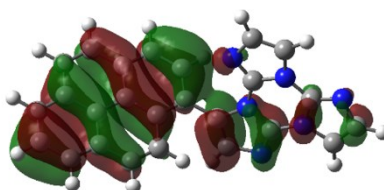

MO=102 (HOMO-1)

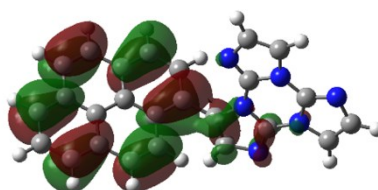

MO=103 (HOMO)

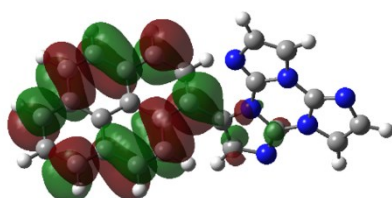

MO=104 (LUMO)

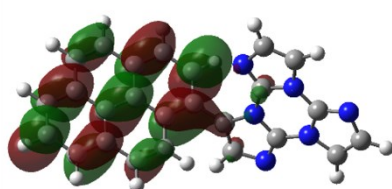

MO=105 (LUMO+1)

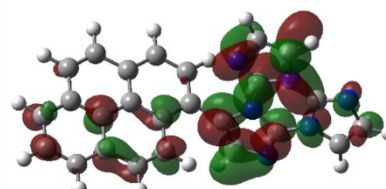

MO=107 (LUMO+3)

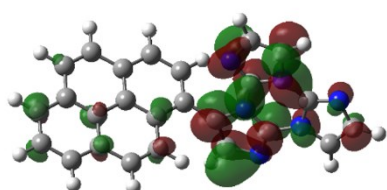

MO=108 (LUMO+4)

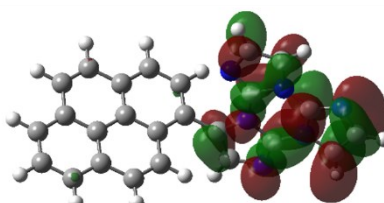

MO=109 (LUMO+5)

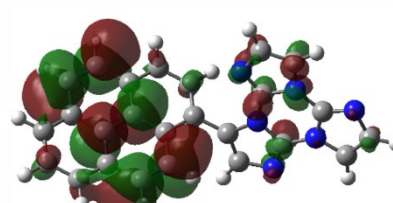

MO=113 (LUMO+9)

**Figure S22.** Plots of the  $\omega$ B97X/6-311++G(d,p) MOs mainly involved in the lowest energy transitions of **TT-Pyr<sub>1</sub>** in RT conformation (isosurfaces value 0.02).



## TTPyr<sub>2</sub>(RT)

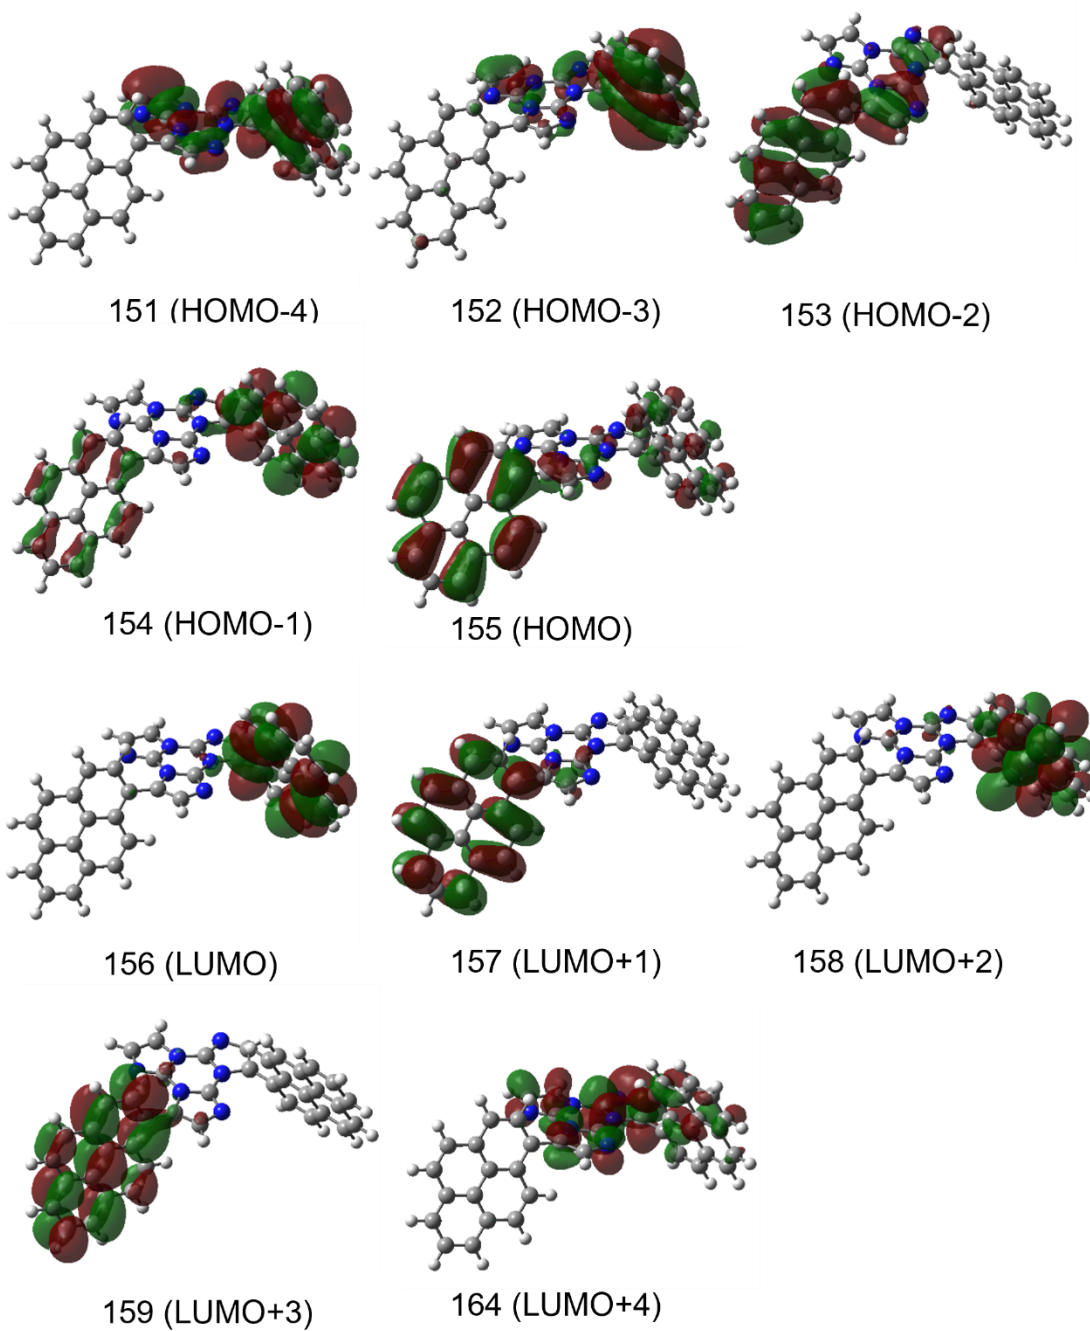

**Figure S23.** Plots of the  $\omega$ B97X/6-311++G(d,p) MOs mainly involved in the lowest energy transitions of **TT-Pyr<sub>2</sub>** in RT/RT conformation (isosurfaces value 0.02).
